# Supplementary material for: Novel JAK Inhibitors to Reduce Graft-Versus-Host Disease after Allogeneic Hematopoietic Cell Transplantation in a Preclinical Mouse Model
Source: MDPI journal article supplement (doi:10.3390/molecules29081801), 2024-04-16
Supplement: s1 [file s1]

## Supplementary Information

### General methods for synthesis of WU derivatives

The starting materials were obtained from commercial sources and used without further purification after verifying their purities through LC-MS analysis. Solvents were analytical-grade and used as supplied. Non-commercially available starting materials were synthesized following the procedures in the literature, and were used after further purification and verification of their purities by  $^1\text{H}$  NMR and LC-MS analysis.

Analytical HPLC analyses were performed on an Agilent 1100 system, and LC-MS analyses were conducted on Agilent 1100 Series LC/MSD (G1946C) single-quadrupole mass spectrometer system equipped with an electrospray ionization (ESI) source. Reverse-phase preparative HPLC purifications were performed either on a Biotage SP4 HPFC system or on a CombiFlash*Rf* (Teledyne Isco) system using a variable dual-wavelength UV detector on a Biotage KP-C18-HS 120 g SNAP column and on Redisep *Rf* Gold C18 cartridges using acetonitrile/water gradient containing 0.05% TFA. Normal-phase preparative HPLC purifications were performed either on a Biotage SP4 HPFC system or on a CombiFlash*Rf* (Teledyne Isco) system using a variable dual-wavelength UV detector with pre-packed Biotage KP-SIL SNAP cartridges, Redisep *Rf* silica gel (Isco) cartridges, and ethyl acetate/hexanes gradients.

All final compounds were analyzed via analytical RP-HPLC using a C18 analytical column with a diode array detector, and peaks were monitored at 210, 254, and 280 nm for their purity.  $^1\text{H}$  and  $^{19}\text{F}$  NMR spectra were recorded in deuterated solvents ( $\text{DMSO-d}_6$ ,  $\text{CD}_3\text{OD}$ , and  $\text{CDCl}_3$ ) on a

Varian 400 MHz NMR spectrometer equipped with a Broad Band NMR probe and an autosampler. The signal of the deuterated solvent was used as an internal reference. The chemical shifts are expressed in ppm ( $\delta$ ), and coupling constants ( $J$ ) are reported in hertz (Hz). The following abbreviations are used to express the multiplicities: s = singlet; d = doublet; t = triplet, q = quartet; dd = doublet of doublets; m = multiplet; and br = broad. Reactions were performed under an atmosphere of dry nitrogen unless otherwise stated.

## Synthetic methods for WU derivatives

1. **WU4**, N-(6-(4-(7H-pyrrolo[2,3-*d*]pyrimidin-4-yl)-1*H*-pyrazol-1-yl)-6-(cyanomethyl) spiro[3.3]heptan-2-yl) ethanesulfonamide.

### Synthetic Scheme for the Synthesis of WU4:

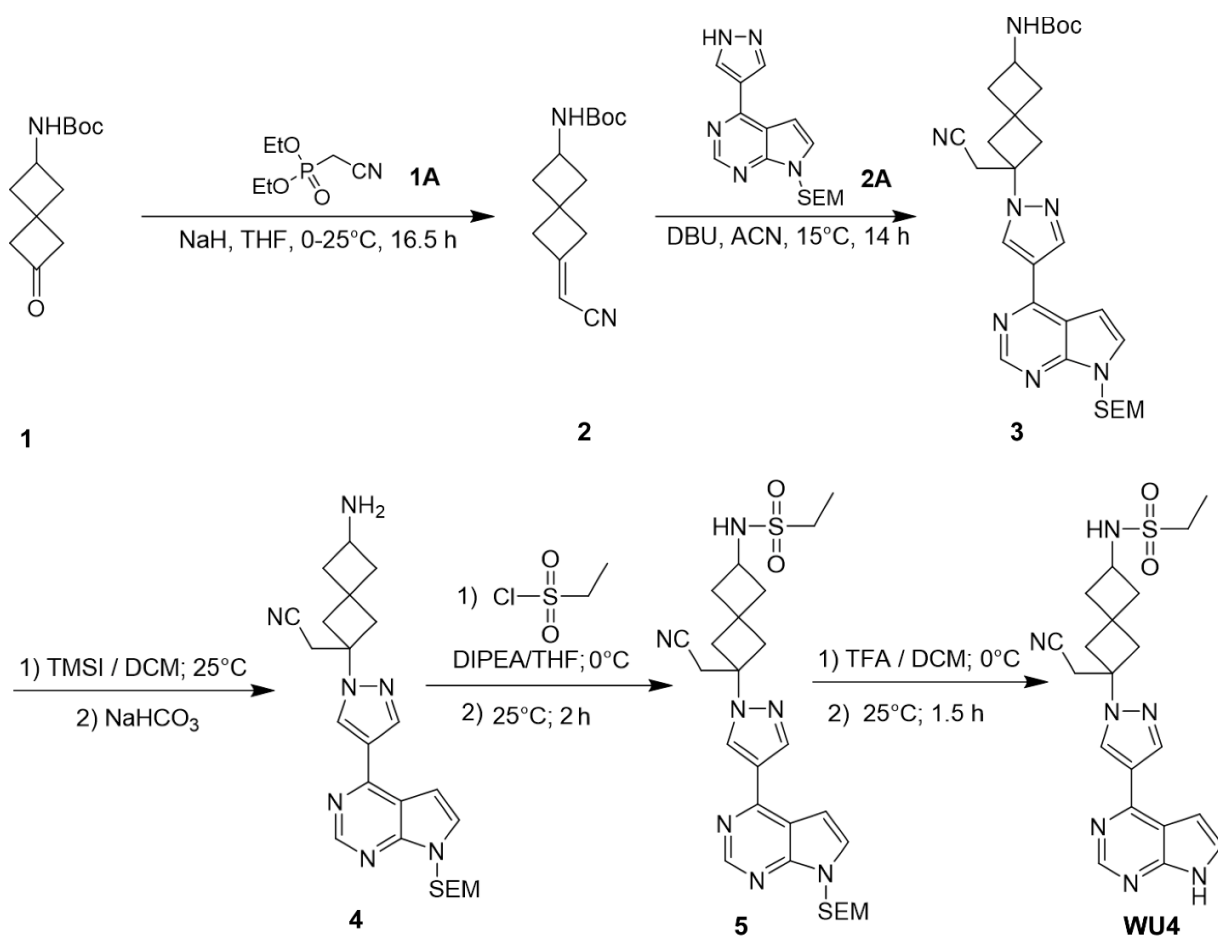

**Step 1.** Preparation of *tert*-butyl (6-(cyanomethylene)spiro[3.3]heptan-2-yl)carbamate.

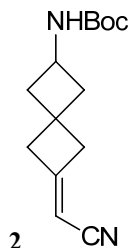

To a solution of NaH (2.13 g, 53.2 mmol, 60% purity, 1.20 *eq*) in THF (100 mL), diethyl (cyanomethyl) phosphonate (**1A**) (9.04 g, 51.0 mmol, 8.22 mL, 1.15 *eq*) was added at 0°C under an N<sub>2</sub> atmosphere. Then, the mixture was stirred at 25°C for 45 min. Then, 2-(Boc-amino)-6-oxospiro[3.3]heptane (**1**) Supplier: Combi-Blocks, cat. # SS-1671 (10.0 g, 44.3 mmol, 1.00 *eq*), in THF (100 mL) was added drop-wise. The mixture was stirred at 25°C for 16 h. The mixture was poured into water (100 mL) and then extracted with ethyl acetate (100 mL x 3). The combined organic phase was washed with brine (100 mL) and the combined organic layers were dried over Na<sub>2</sub>SO<sub>4</sub>, concentrated under vacuum. The crude product was triturated with (Petroleum ether/Ethyl acetate = 50/1) at 25°C for 15 min. The mixture was filtered, and the filter cake was concentrated under vacuum to obtain *tert*-butyl (6-(cyanomethylene)spiro[3.3]heptan-2-yl)carbamate (**2**) (9.10 g, 36.6 mmol, 82.5% yield) as a yellow solid. <sup>1</sup>H NMR (400 MHz, CDCl<sub>3</sub>): δ 5.13 - 5.17 (m, 1H), 4.66 (s, 1H), 4.04 - 4.06 (m, 1H), 2.82 - 3.02 (m, 4H), 2.46 - 2.49 (m, 2H), 1.96 - 1.99 (m, 2H), 1.44 (s, 9H).

**Step 2.** Preparation of *tert*-butyl (6-(cyanomethyl)-6-(4-(7-((2-

(trimethylsilyl)ethoxy)methyl)-7*H*-pyrrolo[2,3-*d*]pyrimidin-4-yl)-1*H*-pyrazol-1-yl)spiro[3.3]heptan-2-yl)carbamate.

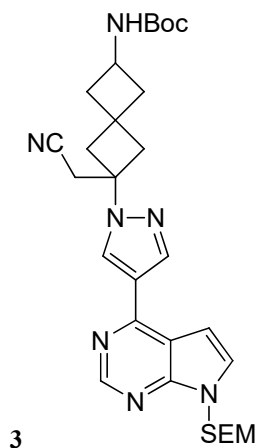

To a solution of *tert*-butyl (6-(cyanomethylene)spiro[3.3]heptan-2-yl)carbamate (**2**) (8.00 g, 32.2 mmol, 1.00 *eq*) and 4-(1*H*-pyrazol-4-yl)-7-((2-(trimethylsilyl)ethoxy)methyl)-7*H*-pyrrolo[2,3-*d*]pyrimidine (**2A**) (Supplier: Sigma Aldrich, cat. # ADE001297) (8.30 g, 26.4 mmol, 0.82 *eq*) in MeCN (90 mL), DBU (4.90 g, 32.2 mmol, 4.86 mL, 1.00 *eq*) was added. The mixture was stirred at 25°C for 16 h. The mixture was poured into water (100 mL) and extracted with ethyl acetate (100 mL x 3). The combined organic phase was washed with brine (100 mL), dried over Na<sub>2</sub>SO<sub>4</sub>, filtered, and concentrated. The crude product was triturated with (Petroleum ether/Ethyl acetate = 30/1) at 25°C for 15 min. The mixture was filtered, and the filter cake was concentrated under vacuum to obtain *tert*-butyl (6-(cyanomethyl)-6-(4-(7-((2-(trimethylsilyl)ethoxy)methyl)-7*H*-pyrrolo[2,3-*d*]pyrimidin-4-yl)-1*H*-pyrazol-1-yl)spiro[3.3]heptan-2-yl)carbamate (**3**) (14.0 g, 23.9 mmol, 74.2% yield, 96.2% purity) as a white solid. <sup>1</sup>H NMR (400 MHz, CDCl<sub>3</sub>): δ 8.84 (s, 1H), 8.36 (s, 1H), 8.29 (s, 1H), 7.39 - 7.40 (d, *J* = 3.6 Hz, 1H), 6.79 - 6.80 (d, *J* = 3.6 Hz, 1H), 4.75 (s, 2H),

4.13 (s, 1H), 3.53 - 3.57 (m, 2H), 2.86 - 3.06 (m, 2H), 2.86 - 2.95 (m, 2H), 2.69 - 2.73 (m, 1H), 2.58 - 2.64 (m, 2H), 2.38 - 2.44 (m, 1H), 2.07 - 2.12 (m, 1H), 1.70 - 2.01 (m, 1H), 1.43 (s, 9H), 0.91 - 0.95 (m, 2H), -0.053 (s, 9H).

**Step 3.** Preparation of 2-(6-amino-2-(4-(7-((2-(trimethylsilyl)ethoxy)methyl)-7H-pyrrolo[2,3-*d*]pyrimidin-4-yl)-1H-pyrazol-1-yl)spiro[3.3]heptan-2-yl)acetonitrile.

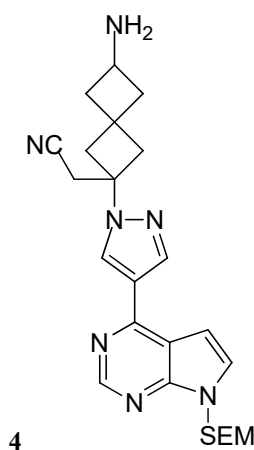

To a solution of *tert*-butyl (6-(cyanomethyl)-6-(4-(7-((2-(trimethylsilyl)ethoxy)methyl)-7H-pyrrolo[2,3-*d*]pyrimidin-4-yl)-1H-pyrazol-1-yl)spiro[3.3]heptan-2-yl)carbamate (**3**) (2.50 g, 4.43 mmol, 1.00 *eq*) in DCM (30 mL), iodotrimethylsilane (1.77 g, 8.87 mmol, 1.21 mL, 2.00 *eq*) was added drop-wise at 25°C. Then, the mixture was stirred at 25°C for 2 h. The mixture was adjusted with saturated aqueous NaHCO<sub>3</sub> until pH = 8 and extracted with DCM (100 mL x 3). The combined organic phase was washed with brine (100 mL) and the combined organic layers were dried over Na<sub>2</sub>SO<sub>4</sub> and concentrated under vacuum

to yield 2-(6-amino-2-(4-(7-((2-(trimethylsilyl)ethoxy)methyl)-7*H*-pyrrolo[2,3-*d*]pyrimidin-4-yl)-1*H*-pyrazol-1-yl)spiro[3.3]heptan-2-yl) acetonitrile (**4**) (2.00 g, 4.27 mmol, 96.2% yield, 98.9% purity) as a yellow oil, which was used for the next step directly. <sup>1</sup>H NMR (400 MHz, CDCl<sub>3</sub>): δ 8.84 (s, 1H), 8.36 (s, 1H), 8.29 (s, 1H), 7.39 - 7.41 (d, *J* = 3.6 Hz, 1H), 6.79 - 6.81 (d, *J* = 3.6 Hz, 1H), 5.68 (s, 2H), 3.53 - 3.57 (m, 2H), 3.43 - 3.47 (m, 1H), 3.07 (s, 2H), 2.84 - 2.91 (m, 2H), 2.66 - 2.70 (m, 1H), 2.56 - 2.61 (m, 2H), 2.35 - 2.37 (m, 1H), 1.91 - 1.96 (m, 1H), 1.80 - 1.83 (m, 1H), 0.91 - 0.95 (m, 2H), -0.053 (s, 9H).

**Step 4.** Preparation of *N*-(6-(cyanomethyl)-6-(4-(7-((2-(trimethylsilyl)ethoxy)methyl)-7*H*-pyrrolo[2,3-*d*]pyrimidin-4-yl)-1*H*-pyrazol-1-yl)spiro[3.3]heptan-2-yl)ethanesulfonamide.

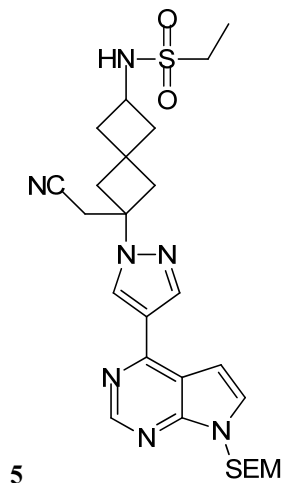

To a solution of 2-(6-amino-2-(4-(7-((2-(trimethylsilyl)ethoxy)methyl)-7*H*-pyrrolo[2,3-*d*]pyrimidin-4-yl)-1*H*-pyrazol-1-yl)spiro[3.3]heptan-2-yl)acetonitrile (**4**) (1.00 g, 2.16

mmol, 1.00 eq) and DIPEA (557 mg, 4.31 mmol, 751 uL, 2.00 eq) in THF (10 mL), ethanesulfonyl chloride (277 mg, 2.16 mmol, 204 uL, 1.00 eq) was added at 0°C; then, the mixture was stirred at 25°C for 2 h. The mixture was poured into water (50 mL) and extracted with ethyl acetate (50 mL x 3). The combined organic phase was washed with brine (50 mL) and the combined organic layers were dried over Na<sub>2</sub>SO<sub>4</sub>, concentrated under vacuum. The crude *N*-(6-(cyanomethyl)-6-(4-(7-((2-(trimethylsilyl)ethoxy)methyl)-7*H*-pyrrolo [2,3-*d*]pyrimidin-4-yl)-1*H*-pyrazol-1-yl)spiro[3.3]heptan-2-yl)ethanesulfonamide (**5**) (1 g, crude) was used for the next step directly.

**Step 5.** Preparation of *N*-(6-(4-(7*H*-pyrrolo[2,3-*d*]pyrimidin-4-yl)-1*H*-pyrazol-1-yl)-6-(cyanomethyl) spiro[3.3]heptan-2-yl)ethanesulfonamide (WU4).

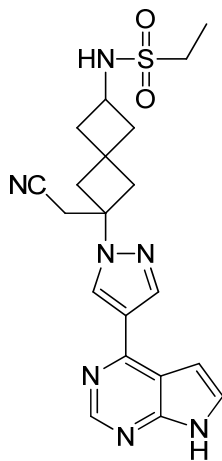

**WU4**



To a solution of *N*-(6-(cyanomethyl)-6-(4-(7-((2-(trimethylsilyl)ethoxy)methyl)-7*H*-pyrrolo[2,3-*d*]pyrimidin-4-yl)-1*H*-pyrazol-1-yl)spiro[3.3]heptan-2-yl)ethanesulfonamide (**5**) (400 mg, 899  $\mu$ mol, 1.00 eq) in DCM (10 mL), TFA (3.85 g, 33.7 mmol, 2.50 mL, 37.5 eq) was added drop-wise at 0°C. The mixture was stirred at 25°C for 1.5 h. The mixture was concentrated in vacuum, the residue was dissolved in methanol (10 mL), and  $\text{NH}_3\text{H}_2\text{O}$  (3 mL) was added to the mixture; then, the mixture was stirred at 25°C for 3 h. The mixture was added to  $\text{H}_2\text{O}$  (10 mL) and extracted with dichloromethane (10 mL x 3). The combined organic phase was washed with brine (50 mL), dried over  $\text{Na}_2\text{SO}_4$ , filtered, and concentrated. The mixture was purified using prep-HPLC (column: Waters Xbridge 150x25 5 $\mu$ ; mobile phase: [water (0.05% ammonium hydroxide v/v)-ACN]; B%: 15%-45%, 10 min) to yield *N*-(6-(4-(7*H*-pyrrolo[2,3-*d*]pyrimidin-4-yl)-1*H*-pyrazol-1-yl)-6-(cyanomethyl) spiro[3.3]heptan-2-yl)ethanesulfonamide (**WU4**) (209 mg, 490  $\mu$ mol, 54.5% yield, 99.8% purity), which was obtained as an off-white solid. LC-MS analysis of the solid confirmed the product mass:  $m/z$  426.2 ( $\text{M}+\text{H}$ )<sup>+</sup>: Calculated for  $\text{C}_{20}\text{H}_{23}\text{N}_7\text{O}_2\text{S}$  = 425.16  $^1\text{H}$  NMR (400 MHz,  $\text{CDCl}_3$ ):  $\delta$  9.58 - 9.60 (m, 1H), 8.82 (d,  $J$  = 5.2 Hz, 1H), 8.38 (s, 1H), 8.31 (s, 1H), 7.38 - 3.39 (m, 1H), 6.79 - 6.80 (m, 1H), 4.62 - 4.65 (m, 1H), 3.87 - 3.97 (m, 1H), 3.01 - 3.05 (m, 2H), 2.95 - 2.99 (m, 4H), 2.72 - 2.75 (m, 3H), 2.40 - 2.52 (m, 1H), 2.11 - 2.20 (m, 1H), 2.08 - 2.09 (m, 1H), 1.35 (t,  $J$  = 7.2 Hz, 3H).

The additional compounds were synthesized via the same procedure as **WU4**, merely substituting the appropriate ketone, as described for each below, or the appropriate sulfonyl

chloride, depending upon the analogue described below.

2. **WU1**, 2-(6-(4-(7H-pyrrolo[2,3-d]pyrimidin-4-yl)-1H-pyrazol-1-yl)-2-(ethylsulfonyl)-2-azaspiro[3.3]heptan-6-yl)acetonitrile.

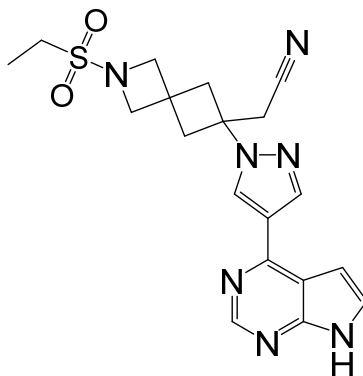

WU1 was synthesized as described above for the synthesis of WU4, but substituting *tert*-Butyl 6-oxo-2-azaspiro[3.3]heptane-2-carboxylate (Supplier: Combi-Blocks cat. # SS-1643) for 2-(Boc-amino)-6-oxospiro[3.3]heptane (1) in Step 1. The crude product was purified via reverse-phase preparative HPLC to afford WU1 as a colorless solid, with a 90% yield. LC-MS analysis of the solid confirmed the product mass:  $m/z$  412  $[M+H]^+$ ;  $m/z$  434  $[M+Na]^+$ . It was also calculated for  $C_{19}H_{21}N_7O_2S$ : 411.48  $^1H$  NMR (400 MHz,  $CD_3OD$ ):  $\delta$  8.89 (s, 1H), 8.86 (s, 1H), 8.49 (s, 1H), 7.82 (d,  $J = 3.50$  Hz, 1H), 7.29 (d,  $J = 3.50$  Hz, 1H), 4.09 (s, 1H), 3.91 (s, 1H), 3.27 (s, 2H), 3.15 (d,  $J = 14.00$  Hz, 2H), 3.02 (q,  $J = 7.40$  Hz, 2H), 2.89 (brd,  $J = 14.00$  Hz, 2H), 1.35 (dd,  $J = 6.62, 3.50$  Hz, 3H), 1.28 (t,  $J = 7.40$  Hz, 3H).

3. **WU2**, 2-(6-(4-(7H-pyrrolo[2,3-d]pyrimidin-4-yl)-1H-pyrazol-1-yl)-1-(ethylsulfonyl)-1-azaspiro[3.3]heptan-6-yl)acetonitrile.

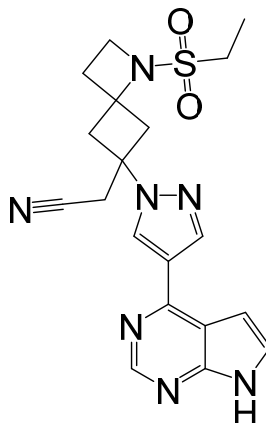

WU2 was synthesized as described above for the synthesis of WU4, but substituting *tert*-butyl 6-oxo-1-azaspiro[3.3]heptane-1-carboxylate (Supplier: 1Click Chemistry cat. # 2C24063) for 2-(Boc-amino)-6-oxospiro[3.3]heptane (1) in Step 1. The crude product was purified via reverse-phase preparative HPLC to afford WU2 as a colorless solid, with a 47% yield. LC-MS analysis of the solid confirmed the product mass:  $m/z$  412.0 ( $M+H$ )<sup>+</sup>;  $m/z$  434.0 ( $M+Na$ )<sup>+</sup>. It was also calculated for C<sub>19</sub>H<sub>21</sub>N<sub>7</sub>O<sub>2</sub>S = 411.48 <sup>1</sup>H NMR (400 MHz, CD<sub>3</sub>OD):  $\delta$  8.91 (s, 1H), 8.88 (s, 1H), 8.50 (s, 1H), 7.84 (s, 1H), 7.37 (s, 1H), 3.68-3.84 (m, 2H), 3.44-3.62 (m, 2H), 2.97 (q,  $J$  = 7.66 Hz, 2H), 2.90-2.93 (m, 2H), 2.66 (s, 2H), 2.43 (t,  $J$  = 7.01 Hz, 2H), 1.38 (t,  $J$  = 7.01 Hz, 2H), 1.24 (t,  $J$  = 7.40 Hz, 3H).

4. **WU3**, 2-(5-(4-(7H-pyrrolo[2,3-d]pyrimidin-4-yl)-1H-pyrazol-1-yl)-2-(ethylsulfonyl)-2-azaspiro[3.3]heptan-5-yl)acetonitrile.

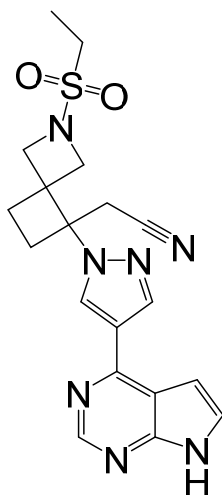

WU3 was synthesized as described above for the synthesis of WU4, but substituting *tert*-butyl 5-oxo-2-azaspiro[3.3]heptane-2-carboxylate (Supplier: 1Click Chemistry cat. # 4C12038) for 2-(Boc-amino)-6-oxospiro[3.3]heptane (1) in Step 1. The crude product was purified by reverse-phase preparative HPLC to afford WU3 as a cream solid with a 40.3% yield. LC-MS analysis of the solid confirmed the product mass:  $m/z$  412  $[M+H]^+$ ;  $m/z$  434  $[M+Na]^+$ . It was also calculated for  $C_{19}H_{21}N_7O_2S$ : 411.48  $^1H$  NMR (400 MHz,  $CD_3OD$ ):  $\delta$  8.86 (s, 1H), 8.85 (s, 1H), 8.44 (s, 1H), 7.82 (d,  $J = 3.89$  Hz, 1H), 7.26 (d,  $J = 3.89$  Hz, 1H), 4.09-4.32 (m, 2H), 3.11 (q,  $J = 7.40$  Hz, 2H), 2.66-2.99 (m, 2H), 2.05-2.42 (m, 4H), 1.23-1.48 (m, 6H).

5. **WU5**, N-(6-(4-(7H-pyrrolo[2,3-d]pyrimidin-4-yl)-1H-pyrazol-1-yl)-6-(cyanomethyl)spiro[3.3]heptan-2-yl)-tert-butylsulfamoylamide.

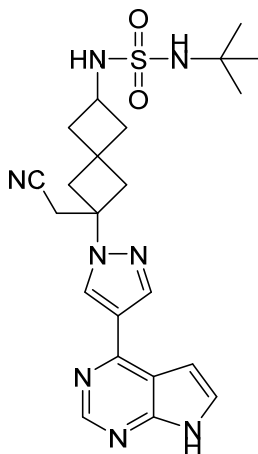

WU5 was synthesized as described above for the synthesis of WU4, but substituting *tert*-butylsulfamoyl chloride (Supplier: 1Click Chemistry cat. #1C18375) for ethanesulfonyl chloride in Step 4. The crude product was purified using pre-HPLC (column: Xtimate C18 10 u 250 mm\*80 mm; mobile phase: [water (0.05% ammonium hydroxide v/v)-ACN]; B%: 26%-46%, 10 min) to yield WU5 as a white solid, with a 7.38% yield. LC-MS analysis of the solid confirmed the product mass:  $m/z$  469.4 ( $M+H$ )<sup>+</sup>. It was also calculated for C<sub>22</sub>H<sub>28</sub>N<sub>8</sub>O<sub>2</sub>S = 468.2 <sup>1</sup>H NMR: (400 MHz DMSO-d<sub>6</sub>):  $\delta$  8.70 (d,  $J$  = 10.8 Hz, 2H), 8.39 (s, 1H), 7.59 (d,  $J$  = 3.2 Hz, 1H), 7.05 (d,  $J$  = 3.6 Hz, 1H), 6.48 (s, 1H), 3.60 (s, 1H), 2.91 (d,  $J$  = 12.8 Hz, 3H), 2.60 (s, 3H), 2.45 - 2.46 (m, 1H), 2.22 - 2.24 (m, 1H), 2.10 - 2.15 (m, 1H), 2.00 - 2.05 (m, 1H), 1.20 (s, 9H).

6. **WU6**, N-(6-(4-(7H-pyrrolo[2,3-d]pyrimidin-4-yl)-1H-pyrazol-1-yl)-6-(cyanomethyl)spiro [3.3]heptan-2-yl)-1,1,1-trifluoromethanesulfonamide.

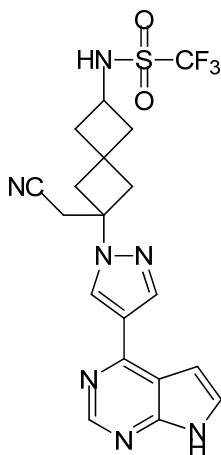

WU6 was synthesized as described above for the synthesis of WU4, but substituting trifluoromethanesulfonyl chloride (Supplier: Sigma Aldrich cat. # 164798) for ethane sulfonyl chloride in Step 4, and was purified by pre-HPLC (column: Phenomenex Gemini 150\*25 mm\*10 um;mobile phase: [water (10 mM NH<sub>4</sub>HCO<sub>3</sub>)-ACN]; B%: 18%-48%,10 min) to yield WU6 as an off-white solid, with a 31.3% yield. LC-MS analysis of the solid confirmed the product mass:  $m/z$  466.3 (M+H)<sup>+</sup>. It was also calculated for C<sub>19</sub>H<sub>18</sub>F<sub>3</sub>N<sub>7</sub>O<sub>2</sub>S = 465.12 <sup>1</sup>H NMR (400 MHz, DMSO-d<sub>6</sub>):  $\delta$  12.10 (d, J = 0.73 Hz, 1H), 9.72 (br s, 1H), 8.70 (s, 1H), 8.68 (s, 1H), 8.38 (s, 1H), 7.59 - 7.60 (m, 1H), 7.05 (dd, J = 3.55,1.17 Hz, 1H), 3.87 (t, J = 8.07 Hz, 1H), 2.86 - 2.97 (m, 2H), 2.66 - 2.67 (m, 2H), 2.52 (br s, 4H), 2.16 - 2.23 (m, 1H), 2.06 - 2.13 (m, 1H).

7. **WU7**, 2-(9-(4-(7H-pyrrolo[2,3-d]pyrimidin-4-yl)-1H-pyrazol-1-yl)-3-(ethylsulfonyl)-3-azaspiro[5.5]undecan-9-yl)acetonitrile.

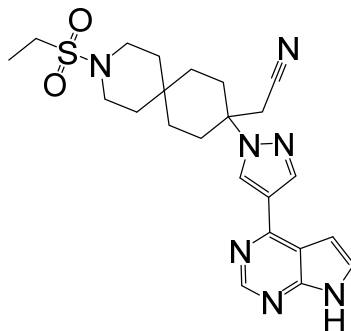

WU7 was synthesized as described above for the synthesis of WU4, but substituting *tert*-Butyl 9-oxo-3-azaspiro[5.5]undecane-3-carboxylate (Supplier: Combi-Blocks cat. # QA-9832) for 2-(Boc-amino)-6-oxospiro[3.3]heptane (1) in Step 1. The crude product was purified by reverse-phase preparative HPLC to afford WU7 as a white solid, with a 70% yield. LC-MS analysis of the solid confirmed the product mass:  $m/z$  468  $[M+H]^+$ ;  $m/z$  490  $[M+Na]^+$ . It was also calculated for  $C_{23}H_{29}N_7O_2S$ : 467.59  $^1H$  NMR (400 MHz,  $CD_3OD$ ):  $\delta$  8.96 (s, 1H), 8.91 (s, 1H), 8.56 (s, 1H), 7.87 (d,  $J = 3.89$  Hz, 1H), 7.35 (d,  $J = 3.89$  Hz, 1H), 3.29-3.34 (m, 2H), 3.21-3.27 (m, 2H), 3.15 (s, 2H), 3.03 (q,  $J = 7.40$  Hz, 2H), 2.58-2.69 (m, 2H), 2.11-2.23 (m, 2H), 1.66-1.77 (m, 4H), 1.34-1.50 (m, 4H), 1.31 (t,  $J = 7.40$  Hz, 3H).



8. **WU8**, 2-(4-(4-(7H-pyrrolo[2,3-d]pyrimidin-4-yl)-1H-pyrazol-1-yl)-1,1-dioxidotetrahydro-2H-thiopyran-4-yl)acetonitrile.

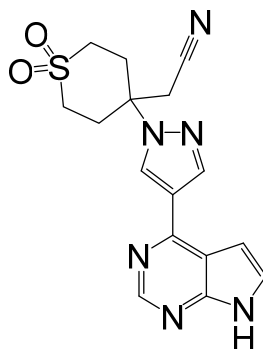

WU8 was synthesized as described above for the synthesis of WU4, but substituting 1,1-Dioxo-tetrahydro-thiopyran-4-one (Supplier: Combi-Blocks cat. # QA-0853)

for 2-(Boc-amino)-6-oxospiro[3.3]heptane (**1**) in Step 1. The crude product was purified via reverse-phase preparative HPLC (column: Biotage KP-C18 HS 120 g column; mobile phase: [water/ACN]; 10%-70%) to yield WU8 as a colorless crystalline solid, with an 80% yield. LC-MS analysis of the solid confirmed the product mass:  $m/z$  357.0 ( $M+H$ )<sup>+</sup>;  $m/z$  379 ( $M+Na$ )<sup>+</sup>. It was also calculated for  $C_{16}H_{16}N_6O_2S$  = 356.40 <sup>1</sup>H NMR (400 MHz, DMSO- $d_6$ ):  $\delta$  12.63 (brs, 1H, NH), 9.01 (s, 1H), 8.86 (s, 1H), 8.57 (s, 1H), 7.79 (s, 1H), 7.26 (s, 1H), 3.42 (s, 2H), 3.31 (d,  $J$  = 13.62 Hz, 2H), 3.12 (d,  $J$  = 14.40 Hz), 3.04 (t,  $J$  = 12.26 Hz, 2H), 2.59 (t,  $J$  = 12.26 Hz, 2H).

9. **WU9**, 2-(3-(4-(7H-pyrrolo[2,3-d]pyrimidin-4-yl)-1H-pyrazol-1-yl)-1,1-dioxithietan-3-yl)acetonitrile.

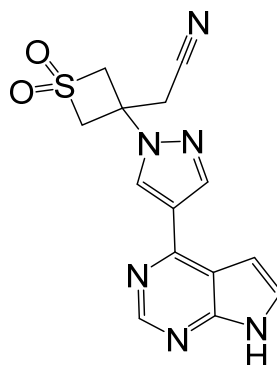

WU9 was synthesized as described above for the synthesis of WU4, but substituting Thietan-3-One 1,1-Dioxide (Supplier: AstaTech cat. # D75198) for 2-(Boc-amino)-6-oxospiro[3.3]heptane (1) in Step 1. The crude product was purified via reverse-phase preparative HPLC to afford WU9 as a white solid, with a 93.6% yield. LC-MS analysis of the solid confirmed the product mass:  $m/z$  329.0 ( $M+H$ )<sup>+</sup>;  $m/z$  351 ( $M+Na$ )<sup>+</sup>. It was also calculated for C<sub>14</sub>H<sub>12</sub>N<sub>6</sub>O<sub>2</sub>S = 328.35 <sup>1</sup>H NMR (400 MHz, CD<sub>3</sub>OD):  $\delta$  9.18 (s, 1H), 8.94 (s, 1H), 8.58 (s, 1H), 7.90 (d,  $J$  = 3.89 Hz, 1H), 7.37 (d,  $J$  = 3.89 Hz, 1H), 5.10-5.25 (m, 2H), 4.85-4.90 (m, 2H), 3.71 (s, 2H), 2.66 (s, 1H).

**10. WU10**, 2-(1-(4-(7H-pyrrolo[2,3-d]pyrimidin-4-yl)-1H-pyrazol-1-yl)-3-(methylsulfonyl) cyclobutyl)acetonitrile.

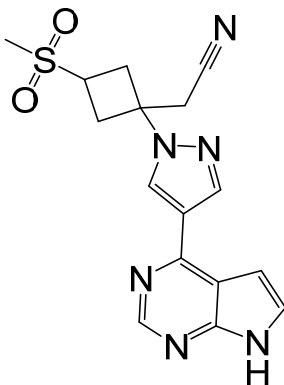

WU10 was synthesized as described above for the synthesis of WU4, but substituting 3-methanesulfonylcyclobutan-1-one (Supplier: 1Click Chemistry cat. # 4C32576) for 2-(Boc-amino)-6-oxospiro[3.3]heptane (1) in Step 1. The crude product was purified by reverse-phase preparative HPLC to afford WU10 as a white solid, with a 37% yield. LC-MS analysis of the solid showed the desired product's mass:  $m/z$  357  $[M+H]^+$  and  $m/z$  379  $[M+Na]^+$ . It was also calculated for  $C_{16}H_{16}N_6O_2S$ : 356.40  $^1H$  NMR (400 MHz,  $CD_3OD$ ):  $\delta$  8.97 (s, 1H), 8.87 (s, 1H), 8.50 (s, 1H), 7.82 (d,  $J = 3.50$  Hz, 1H), 7.30 (d,  $J = 3.50$  Hz, 1H), 4.09-4.28 (m, 2H), 3.52 (s, 2H), 3.22-3.29 (m, 2H), 2.99-3.06 (m, 2H), 2.97 (s, 3H).
