# Supplementary material for: Novel JAK Inhibitors to Reduce Graft-Versus-Host Disease after Allogeneic Hematopoietic Cell Transplantation in a Preclinical Mouse Model
Source: MDPI journal article supplement (doi:10.3390/molecules29081801), 2024-04-16
Supplement: s1 [file s1]

after allo-HCT. LyG6-CD11b+Ly6C<sup>high</sup> and LyG6-CD11b+Ly6C<sup>middle</sup> serve as classical and intermediate monocyte subsets. \*p<.05, \*\* p<.01, and \*\*\* p<.001. All error bars are represented as mean±standard deviation.

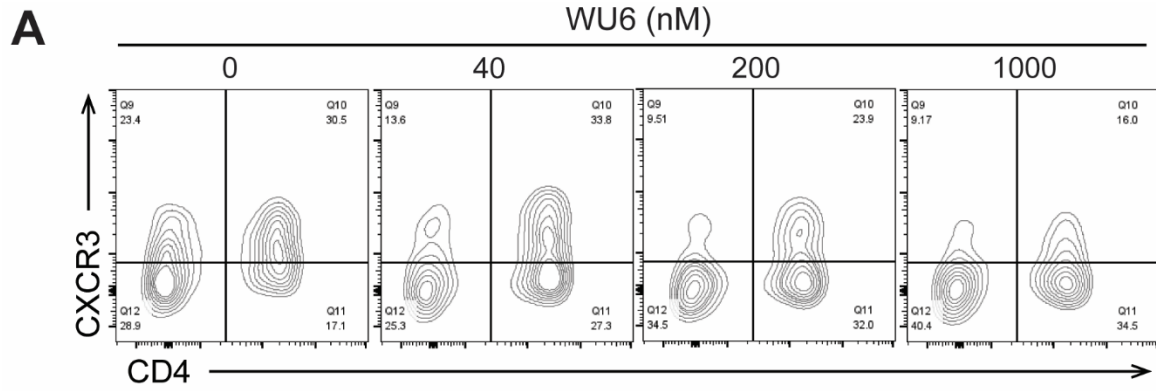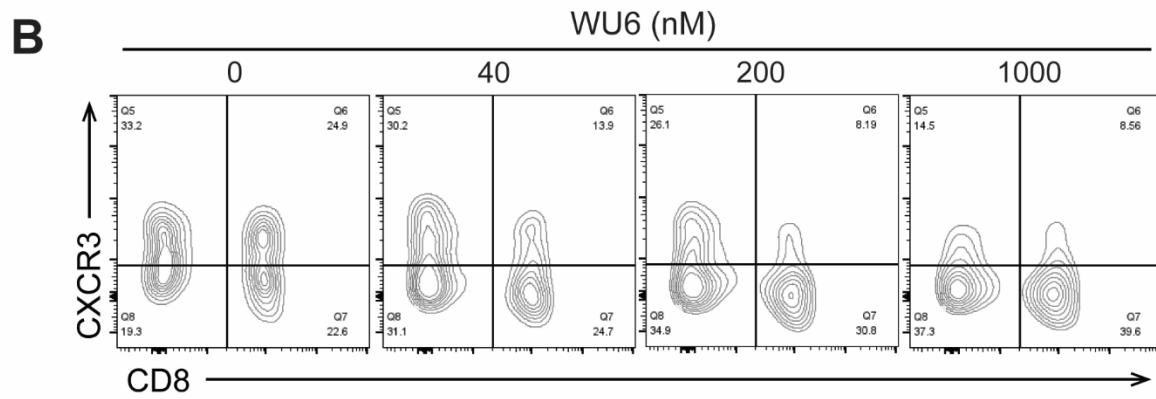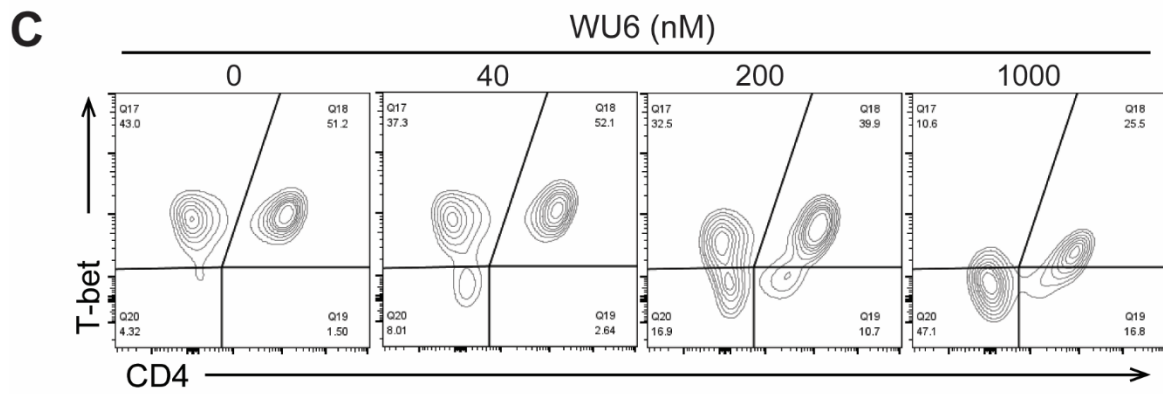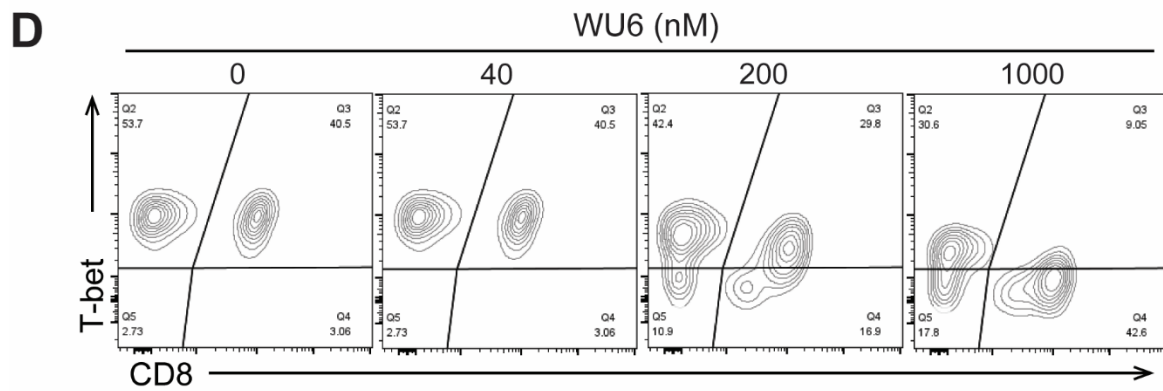

**Supplementary Figure S2. Effect of WU6 on the expression of CXCR3 and T-bet in vitro.**

Primary T cells were isolated from B6 and treated with WU6 at indicated doses for 3 days in the presence of anti-CD3/CD28 activation beads. After 3 days, the expression of CXCR3 (A-B) and T-bet (C-D) in the CD4 and CD8 was determined by flow cytometry and the representative plots were represented in A-D.
